# Supplementary material for: Allelopathic Potential of Mangroves from the Red River Estuary against the Rice Weed Echinochloa crus-galli and Variation in Their Leaf Metabolome
Source: MDPI journal article supplement (doi:10.3390/plants11192464), 2022-09-21
Supplement: s1 [file s1]

Supplementary Material

# Allelopathic Potential of Mangroves from the Red River Estuary against the Rice Weed *Echinochloa crus-galli* and Variation in Their Leaf Metabolome

Dounia Dhaou <sup>1,\*</sup>, Virginie Baldy <sup>1</sup>, Dao Van Tan <sup>2</sup>, Jean-Rémi Malachin <sup>1</sup>, Nicolas Pouchard <sup>1</sup>, Anaïs Roux <sup>1</sup>, Sylvie Dupouyet <sup>1</sup>, Stéphane Greff <sup>1</sup>, Gérald Culioli <sup>1</sup>, Thomas Michel <sup>3</sup>, Catherine Fernandez <sup>1</sup> and Anne Bousquet-Mélou <sup>1</sup>

<sup>1</sup> IMBE, Aix Marseille University, Avignon University, CNRS, IRD, 13331 Marseille, France

<sup>2</sup> Department of Genetics-Biochemistry, Faculty of Biology, Hanoi National University of Education (HNUE), 131000 Hanoi, Vietnam

<sup>3</sup> Institut de Chimie de Nice, Université Côte d’Azur, CNRS, UMR 7272, 06108 Nice, France

\* Correspondence: dounia.dhaou@imbe.fr

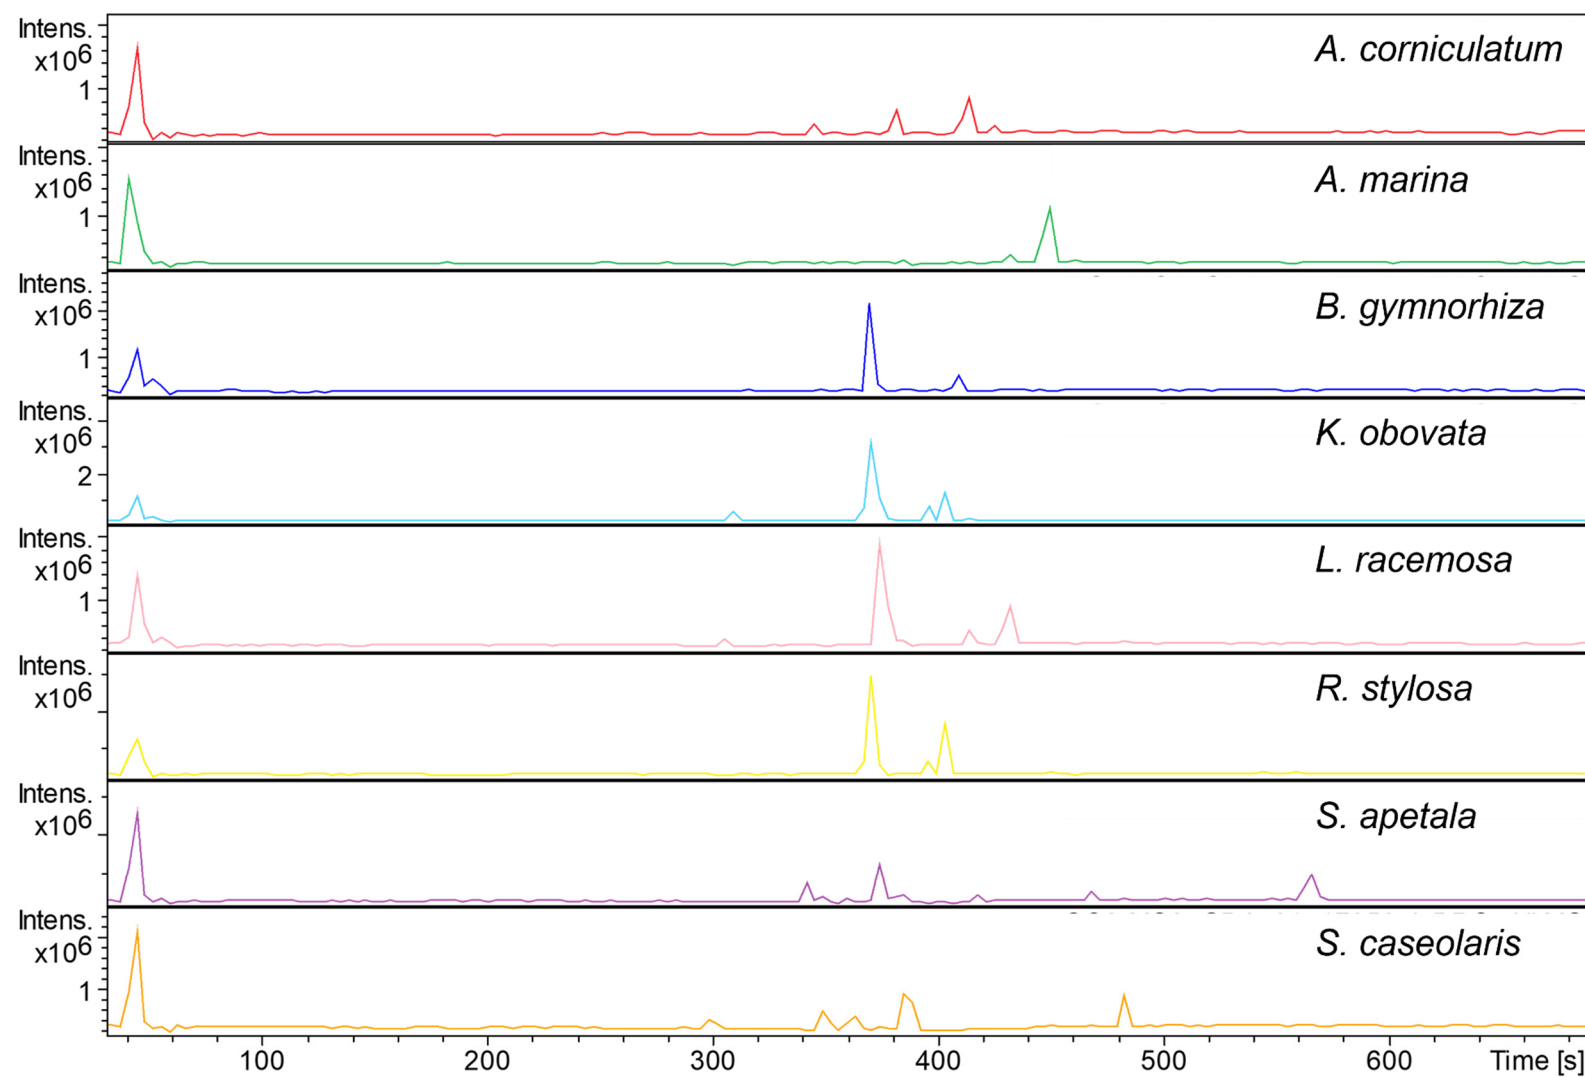

**Figure S1.** UHPLC-ESI-qToF Base Peak Chromatograms (BPC) of leaf methanolic extracts from *Aegiceras corniculatum*, *Avicennia marina*, *Bruguiera gymnorhiza*, *Kandelia obovata*, *Lumnitzera racemosa*, *Rhizophora stylosa*, *Sonneratia apetala* and *S. caseolaris*.

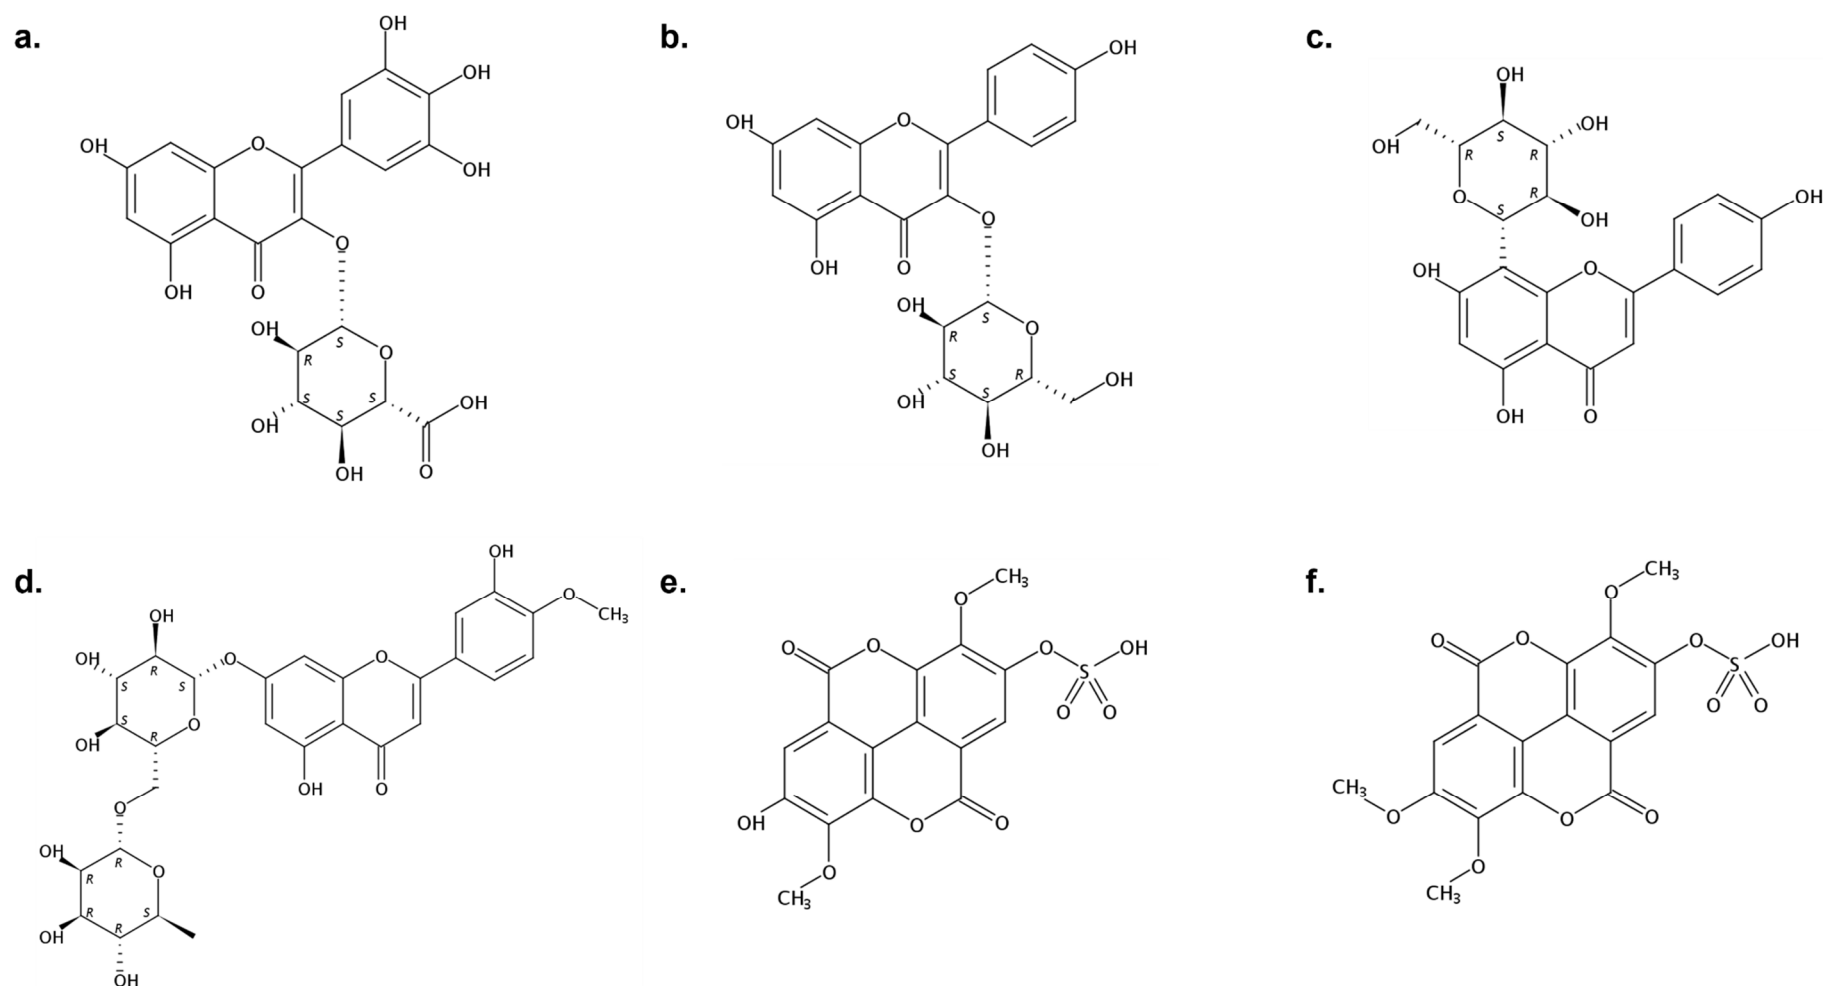

**Figure S2.** Chemical structures of some of the putatively annotated compounds: *Aegiceras corniculatum* compounds **Ac M1** (a, myricetin-3-glucuronide) and **Ac M3** (b, astragaloside), and *Sonneratia apetala* compound **Sa M3** (c, vitexin), biomarker **M607T418 Sa M4** (d, diosmin), compound **Sa M5** (e, dimethyl ellagic acid sulfate) and biomarker **M481T560 Sa M6** (f, 3,3',4'-trimethyl ellagic acid 4-sulfate). All compounds and biomarkers were putatively annotated according to their HRMS/MS spectra.

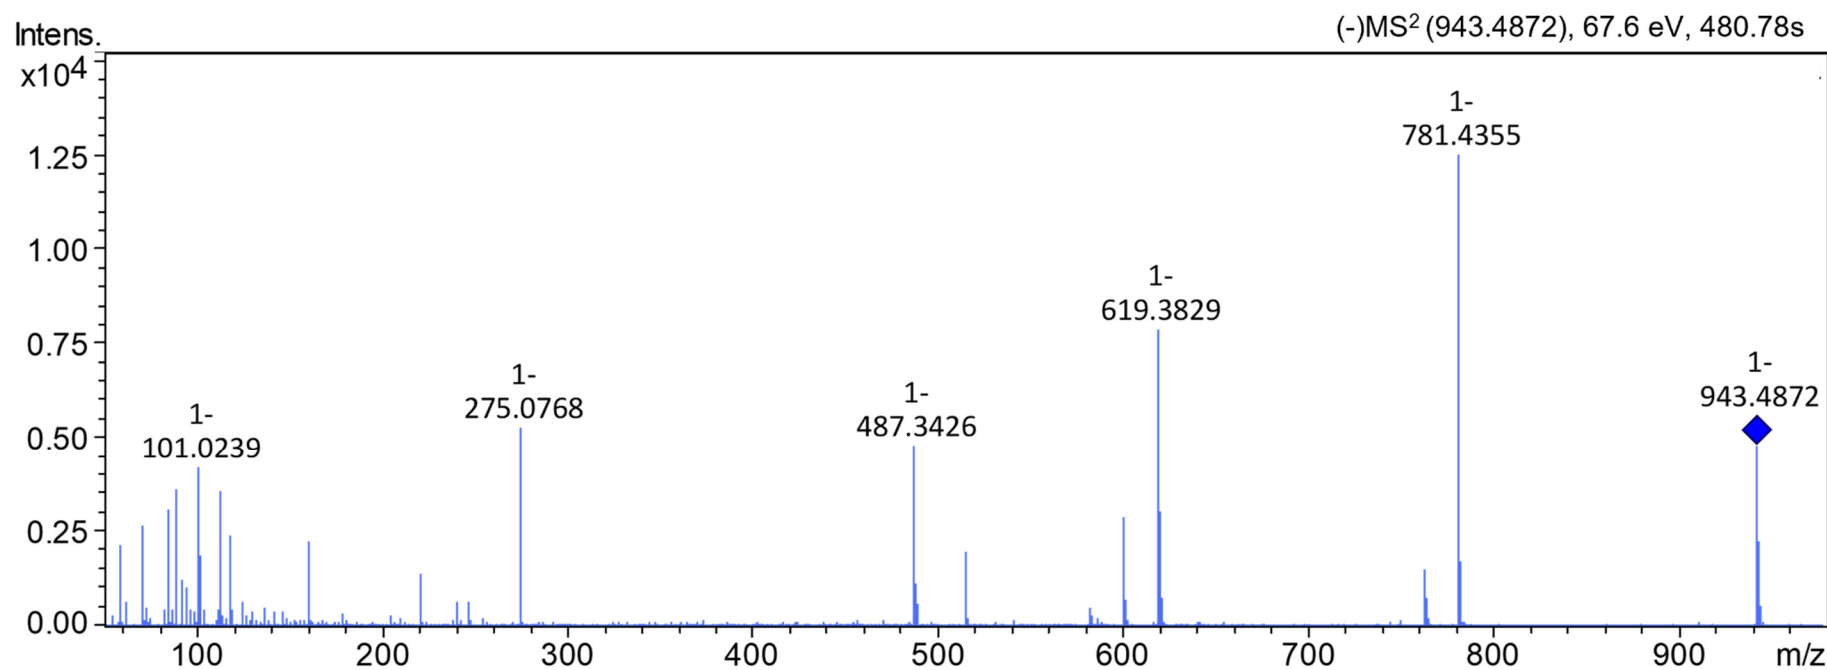

**Figure S3.** HRMS/MS spectrum of *Aegiceras corniculatum* biomarker M943T476 putatively annotated as (3 $\beta$ , 16 $\alpha$ , 20 $\alpha$ )-3,16,28-trihydroxyolean-12-en-29-oic acid 3-{O- $\beta$ -D-glucopyranosyl (1 $\rightarrow$ 2)-O-[ $\beta$ -D-glucopyranosyl (1 $\rightarrow$ 4)]- $\alpha$ -L-arabinopyranoside}.

### Detailed annotation

Biomarker M943T476 gave a  $[M-H]^-$  at  $m/z$  943.4872 and allowed to deduce the molecular formula  $C_{47}H_{76}O_{19}$ . MS/MS spectrum (Figure S3) was almost superposable to that of M781T518 (Figure S5) with the same hexose and pentose unit losses and same deduced aglycone fragment (putative triterpenic acid,  $C_{30}H_{47}O_5$ ), except for an additional hexose loss. Based on MS spectra comparison in literature, this compound could be assigned as (3 $\beta$ ,16 $\alpha$ ,20 $\alpha$ )-3,16,28-trihydroxyolean-12-en-29-oic acid 3-{O- $\beta$ -D-glucopyranosyl-(1 $\rightarrow$ 2)-O-[ $\beta$ -D-glucopyranosyl-(1 $\rightarrow$ 4)]- $\alpha$ -L-arabinopyranoside}, a saponin already described in leaves of *A. corniculatum* collected in Vietnam [41].

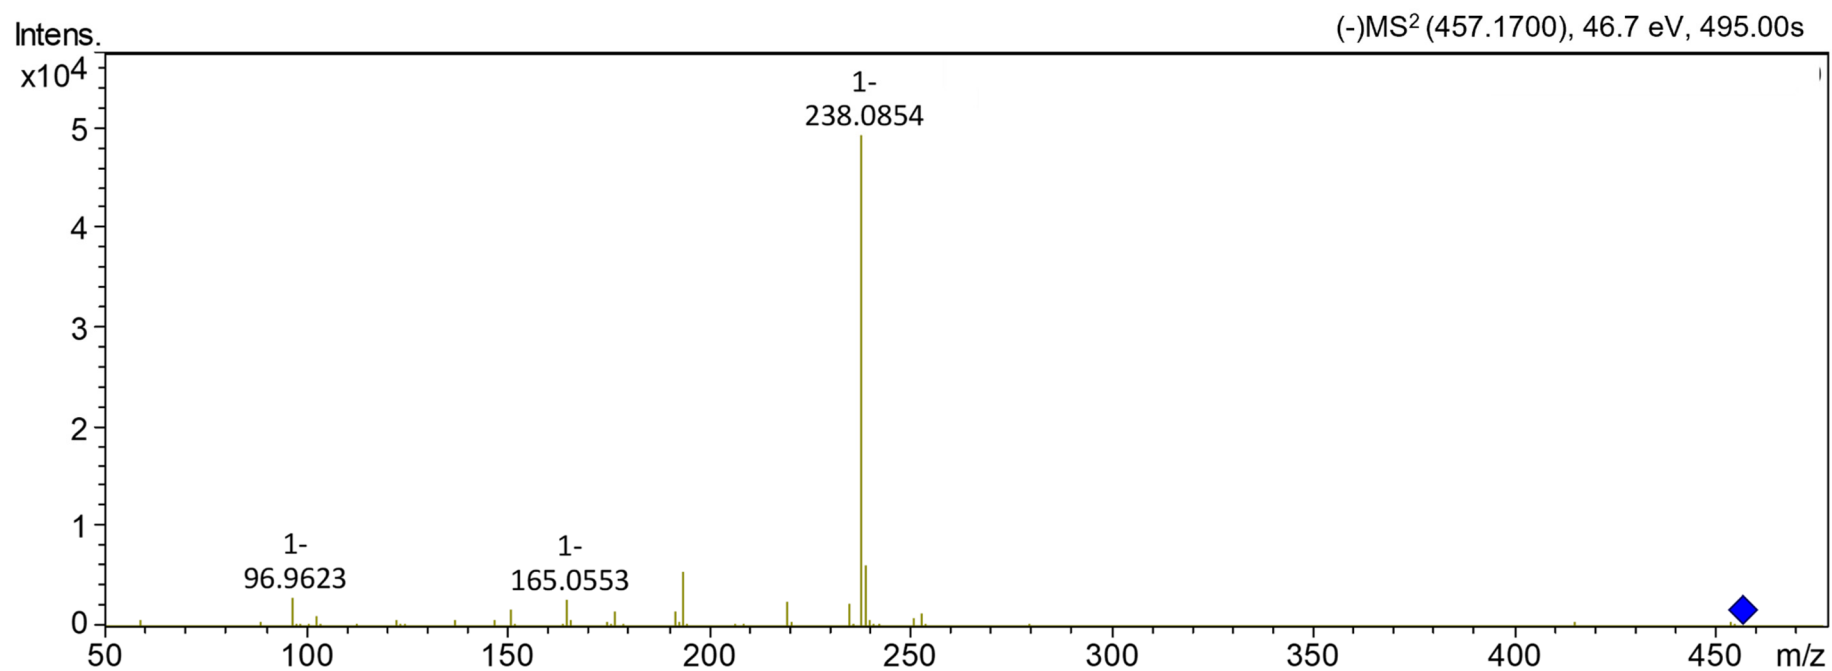

**Figure S4.** HRMS/MS spectrum of *Aegiceras corniculatum* unknown biomarker M457T495.

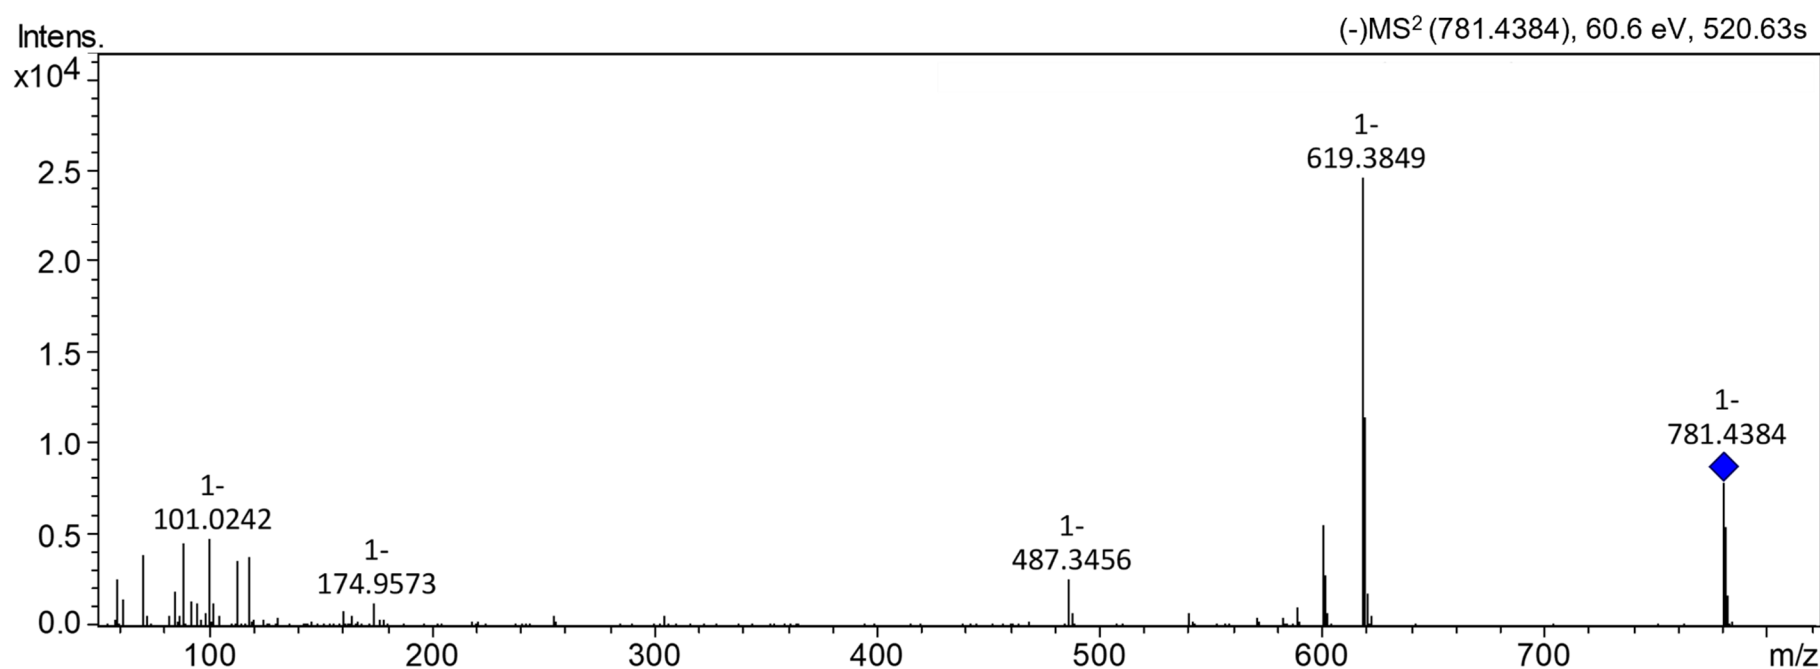

**Figure S5.** HRMS/MS spectrum of *Aegiceras corniculatum* biomarker M781T518 putatively annotated as a triterpenoid saponin.

### Detailed annotation

Biomarker M781T518 specific to *A. corniculatum* leaves produced a deprotonated ion  $[M-H]^-$  at  $m/z$  781.4384 along with a chloride  $[M+Cl]^-$  and a sodium formate  $[M+HCOONa-H]^-$  adducts. MS/MS spectrum (Figure S5) showed the successive losses of a hexose  $[M-H-162]^-$  and a pentose moiety  $[M-H-162-132]^-$ . The corresponding aglycone at  $m/z$  487.3456 ( $C_{30}H_{47}O_5$ ) could correspond to a triterpenic acid according to database interrogation. This compound was therefore putatively annotated as a triterpenoid saponin derivative.

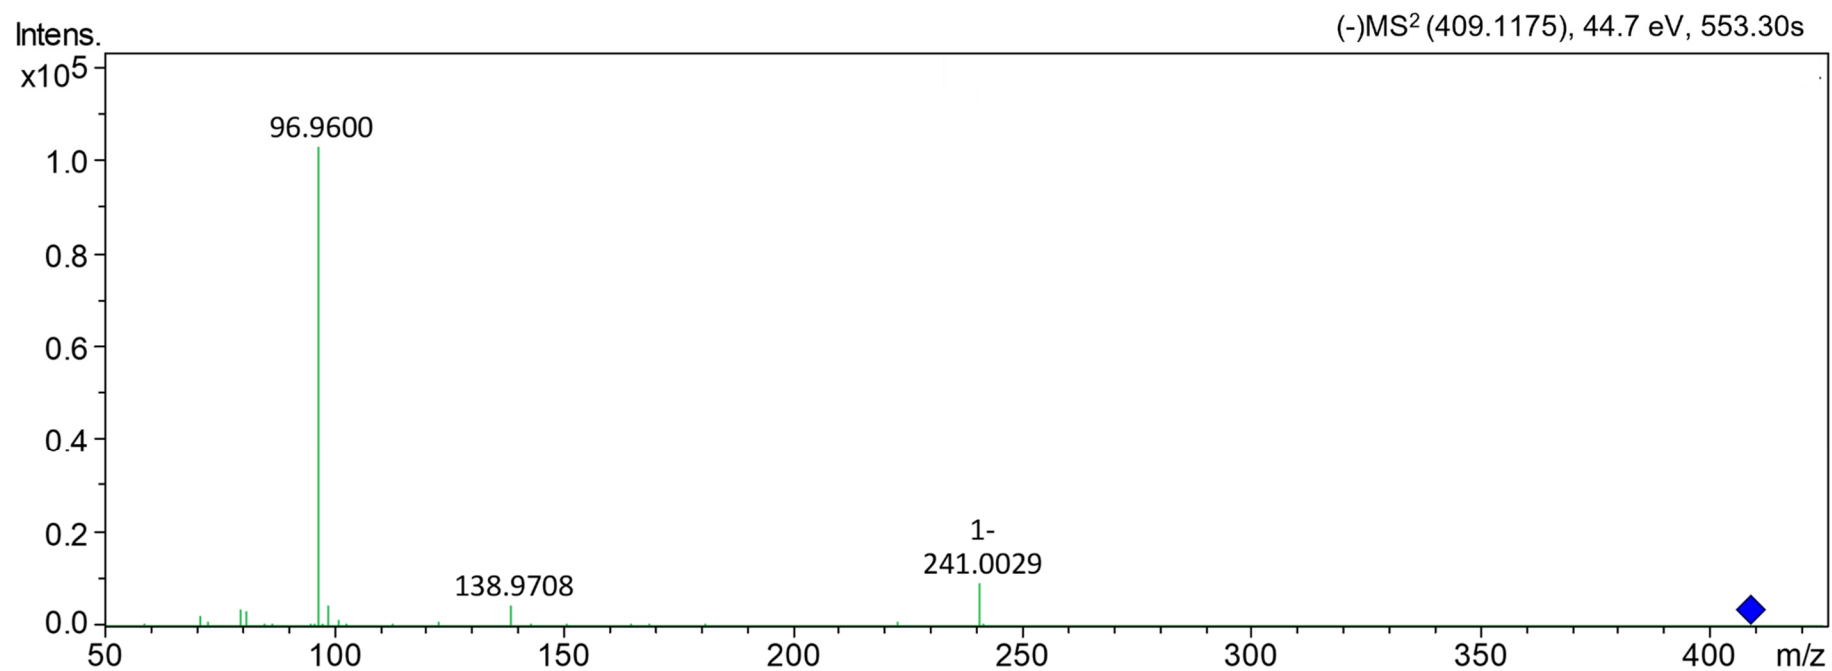

**Figure S6.** HRMS/MS spectrum of *Aegiceras corniculatum* biomarker **M410T546** putatively annotated as a **monoterpene sulfate**.

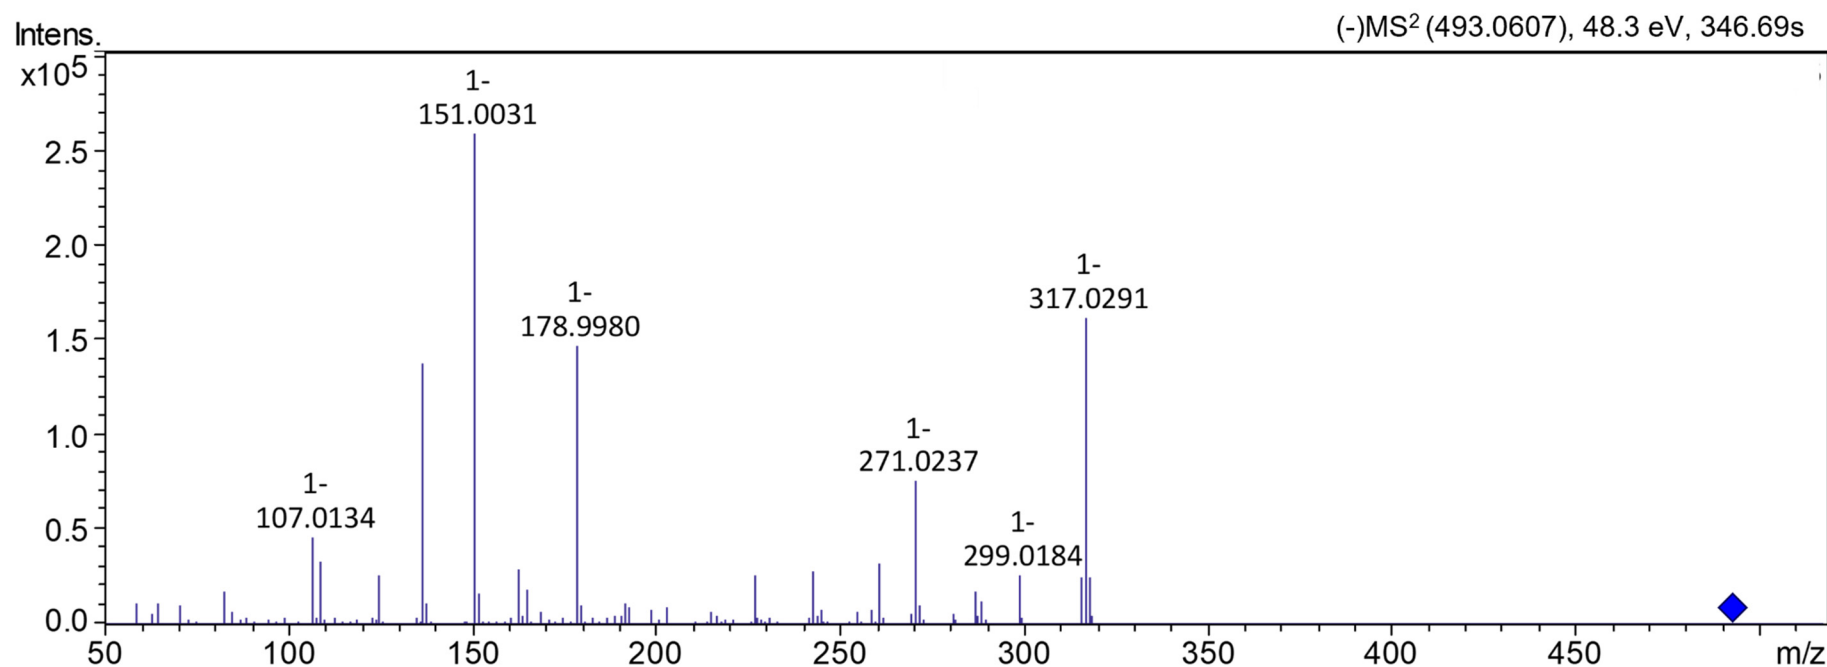

Figure S7. HRMS/MS spectrum of *Aegiceras corniculatum* major BPC compound **Ac M1** putatively annotated as **myricetin-3-glucuronide**.

### Detailed annotation

BPC major compound **Ac M1** presented a pseudo molecular ion  $[M-H]^-$  at  $m/z$  493.0607 corresponding to a raw formula of  $C_{21}H_{17}O_{14}$ . MS/MS fragment ion at  $m/z$  317.0291 highlighted the loss of a glucuronic acid unit  $[M-H-176]^-$  indicating a possible glucuronid flavonoid. Fragments at  $m/z$  178.9980 and 151.0031 suggested the aglycone moiety as myricetin [43]. With a common fragmentation ( $m/z$  317.0291 and 271.0237) described by De Rosso et al, 2015 [52], this compound might be myricetin-3-glucuronid (Figure S2a), found in leaves of mangrove *Conocarpus erectus* [42].



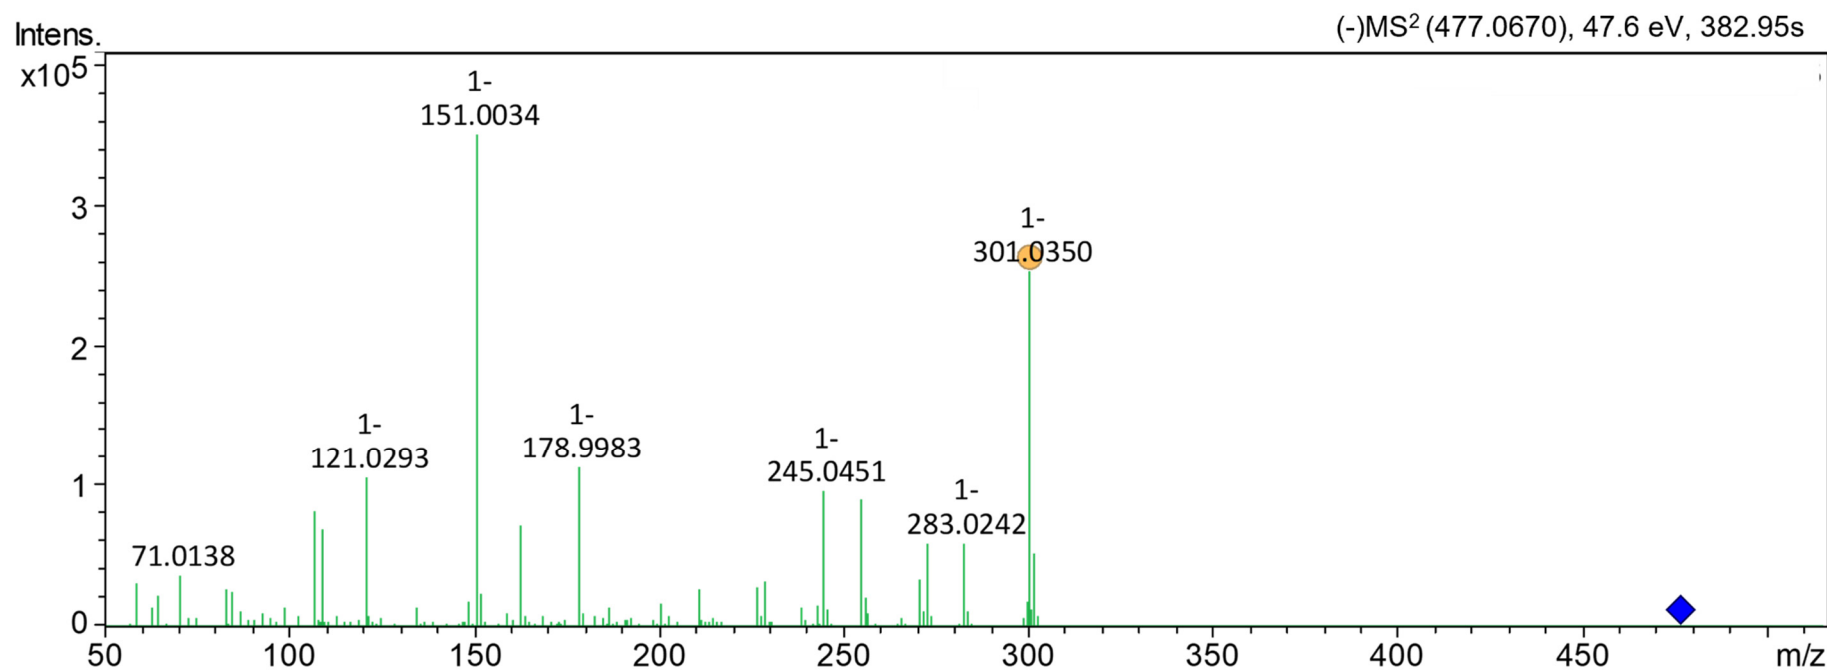

Figure S8. HRMS/MS spectrum of *Aegiceras corniculatum* major BPC compound **Ac M2** putatively annotated as **quercetin glucuronide**.

### Detailed annotation

BPC major compound **Ac M2** gave a  $[M-H]^-$  at  $m/z$  477.067 and showed a loss of glucuronic acid moiety as well with a fragment ion at  $m/z$  301.0350 corresponding to the aglycone unit ( $C_{15}H_9O_7$ ). According to literature, this metabolite could be a quercetin glucuronide already described in *Laguncularia racemosa* [43].

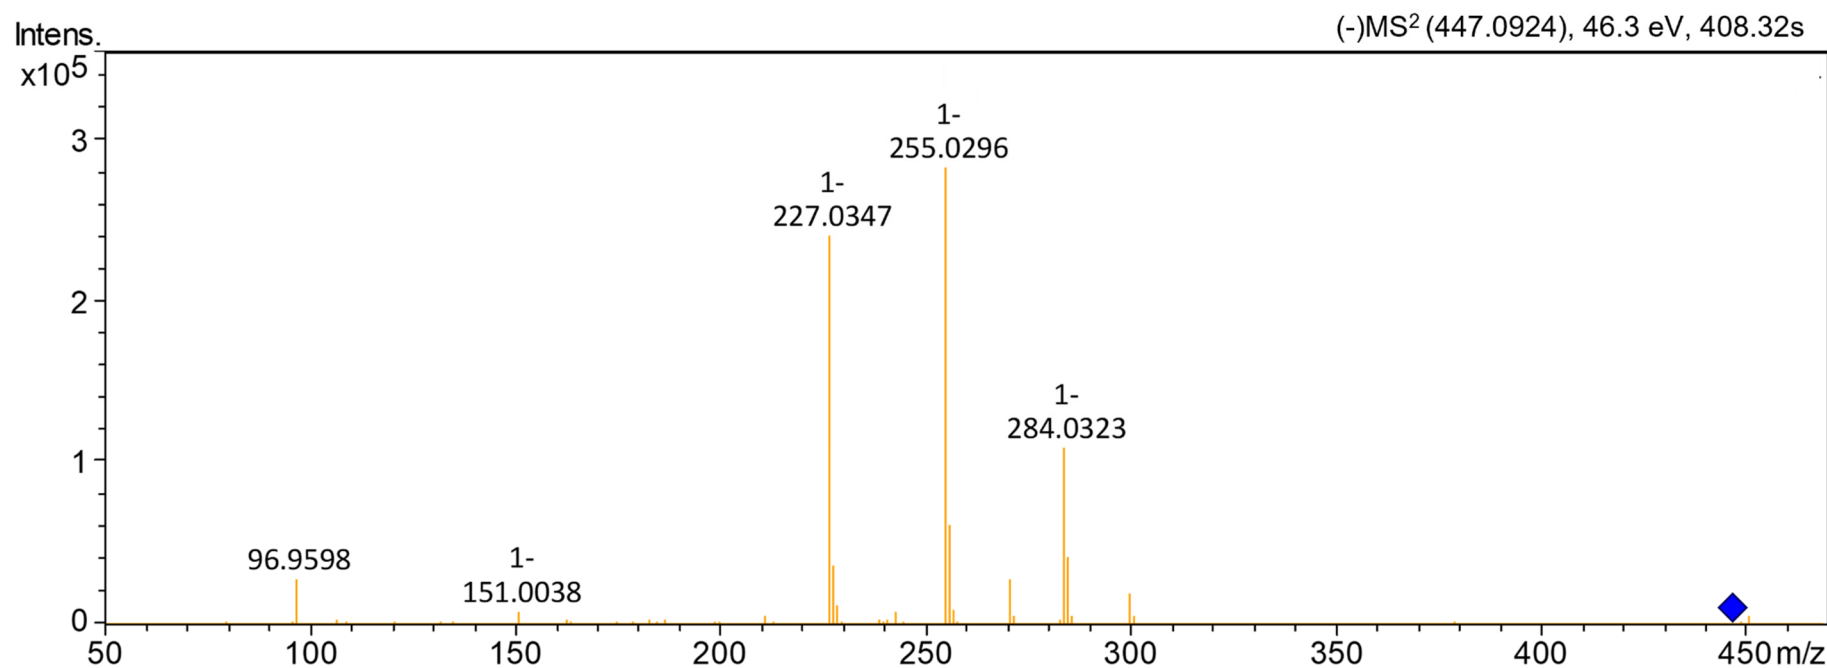

**Figure S9.** HRMS/MS spectrum of *Aegiceras corniculatum* major BPC compound Ac M3 putatively annotated as kaempferol-3-O-glucoside (astragalin)\*. \*Constructor statistical match factor ( $m/z$  defect and comparison of experimental vs theoretical isotopic patterns)

### Detailed annotation

BPC major compound Ac M3 showed a pseudo molecular ion at  $m/z$  447.0924. MS/MS spectrum matched with constructor database (Bruker db) compound kaempferol-3-glucoside (Figure S2b) also known as astragalin (common fragment ions  $m/z$  284.0323, 255.0296 and 227.0347). Vinh et al, 2019 reported this metabolite in *A. corniculatum* leaves, supporting our assumptions [41].

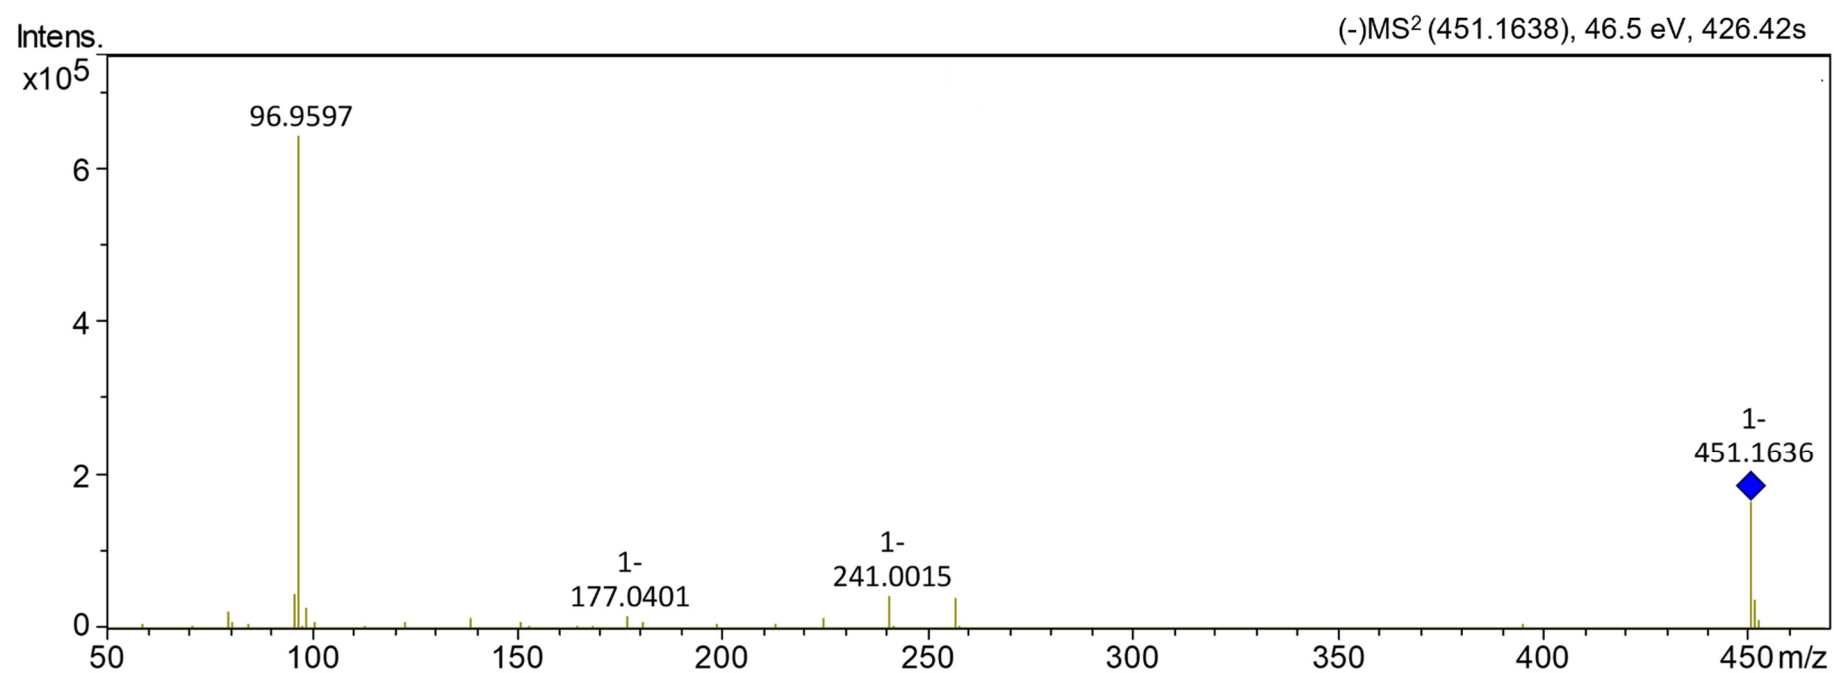

**Figure S10.** HRMS/MS spectrum of *Aegiceras corniculatum* **unknown** major BPC compound **Ac M4**.

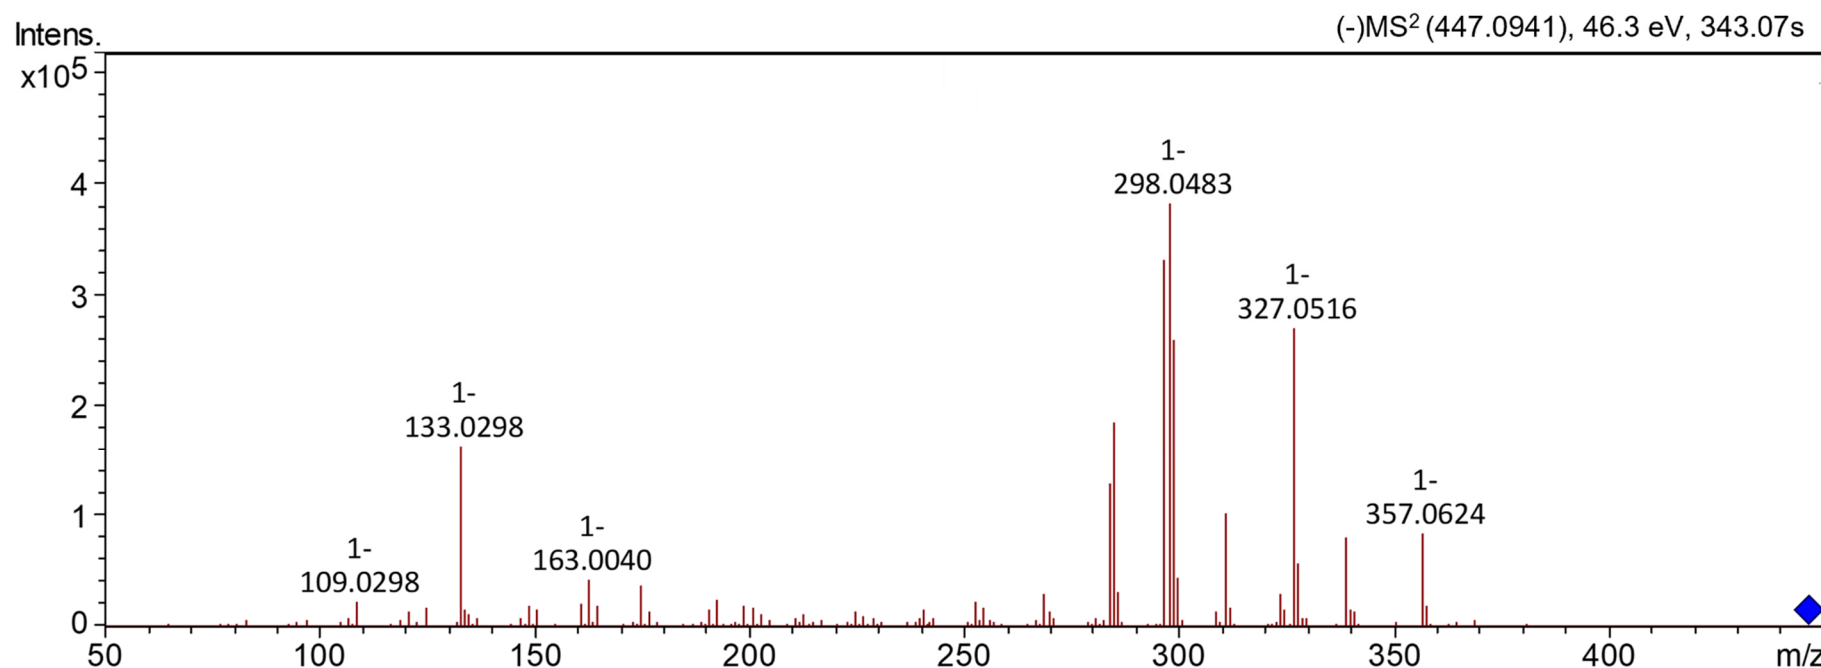

**Figure S11.** HRMS/MS spectrum of *Sonneratia apetala* major BPC compound **Sa M1** (biomarker **M895T343**) putatively annotated as **luteolin-7-O-β-glucoside**.

### Detailed annotation

Biomarker M895T343 (also compound Sa M1) showed a deprotonated molecular ion  $[M-H]^-$  at  $m/z$  447.0941 consistent with a molecular formula of  $C_{21}H_{20}O_{11}$ . Precursor ion fragmentation led to the loss of a hexose moiety producing a deprotonated aglycone ion at  $m/z$  285.0405 with a raw formula of  $C_{15}H_9O_6$ , which could correspond to luteolin or kaempferol. Characteristic fragment ions ( $m/z$  199.0407, 175.0405, 151.0039 and 133.0298) observed in MS/MS spectrum [46] and luteolin already described in *S. apetala* fruits [47] allowed to suggest a luteolin glucoside. Although specifically more abundant in *S. apetala*, biomarker M895T343 was also detected in *S. caseolaris* and *B. gymnorrhiza* extracts (Main text Figure 1b). For these additional reasons, this compound could be a luteolin 7-O-β-glucoside already described in *S. caseolaris* leaves and fruits [48,49].

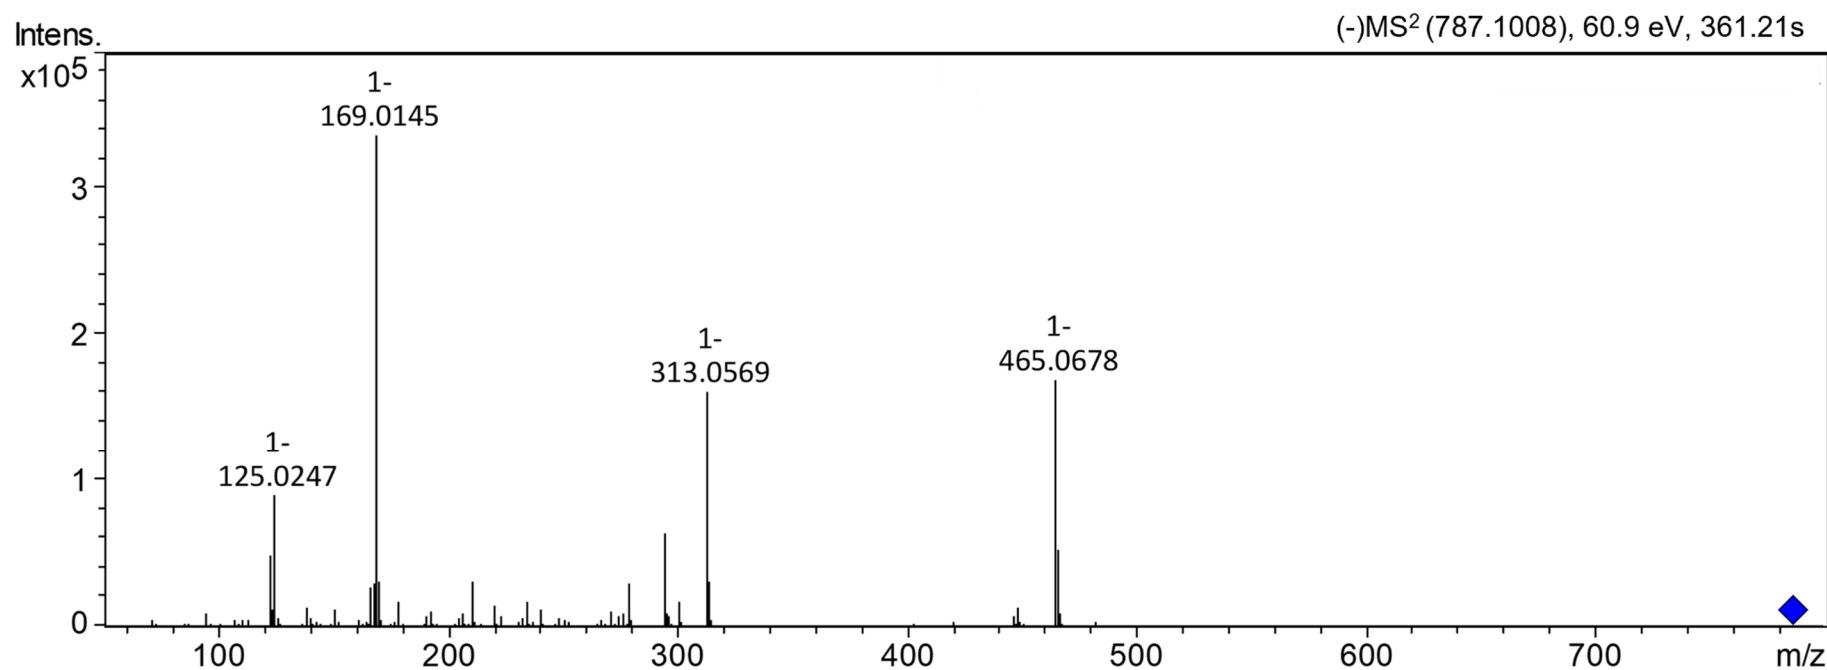

Figure S12. HRMS/MS spectrum of *Sonneratia apetala* major BPC compound **Sa M2** putatively annotated as **tetragalloyl glucose**.

### Detailed annotation

Compound **Sa M2** gave a deprotonated molecular ion  $[M-H]^-$  at  $m/z$  787.1008 which gave a raw formula of  $C_{34}H_{27}O_{22}$ . Online database interrogation led to matches with gallic acid derivatives. Characteristic fragment ions of tetragalloyl glucose [54] were detected at  $m/z$  635.0915, 483.0789, 465.0678, 313.0569, 295.0463 and 169.0145 and showed successive galloyl moiety losses  $[M-H-152]$  [53]. This compound might be a 1,3,4,6-tetra-O-galloyl- $\beta$ -D-glucose previously reported in the mangrove species *Excoecaria agallocha* [51].

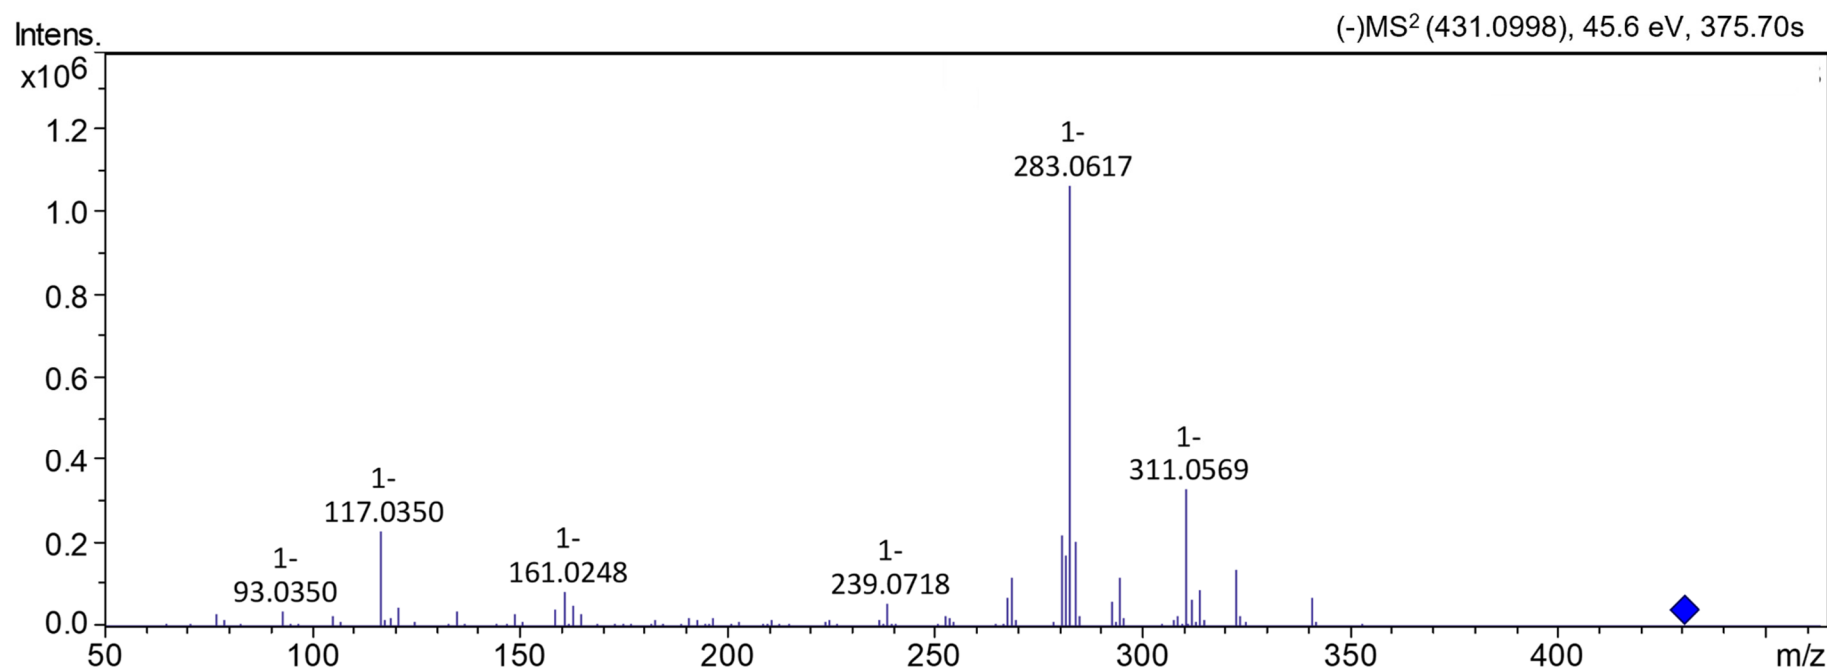

**Figure S13.** HRMS/MS spectrum of *Sonneratia apetala* major BPC compound **Sa M3** putatively annotated as **vitexin\***. \* Constructor statistical match factor ( $m/z$  defect and comparison of experimental vs theoretical isotopic patterns)

### Detailed annotation

Compound **Sa M3** produced a deprotonated molecular ion at  $m/z$  431.0998 allowing to deduce a molecular formula of  $C_{21}H_{20}O_{10}$ . MS/MS spectrum matched with those of vitexin (Figure S2c), a flavone glycoside, in the constructor database. Fragmentation showed two major product ions at  $m/z$  311.0569  $[M-H-120]^-$  and 283.0617 common to the reference standard from database. This compound was already described in *S. apetala* leaves and branches collected in China [50].

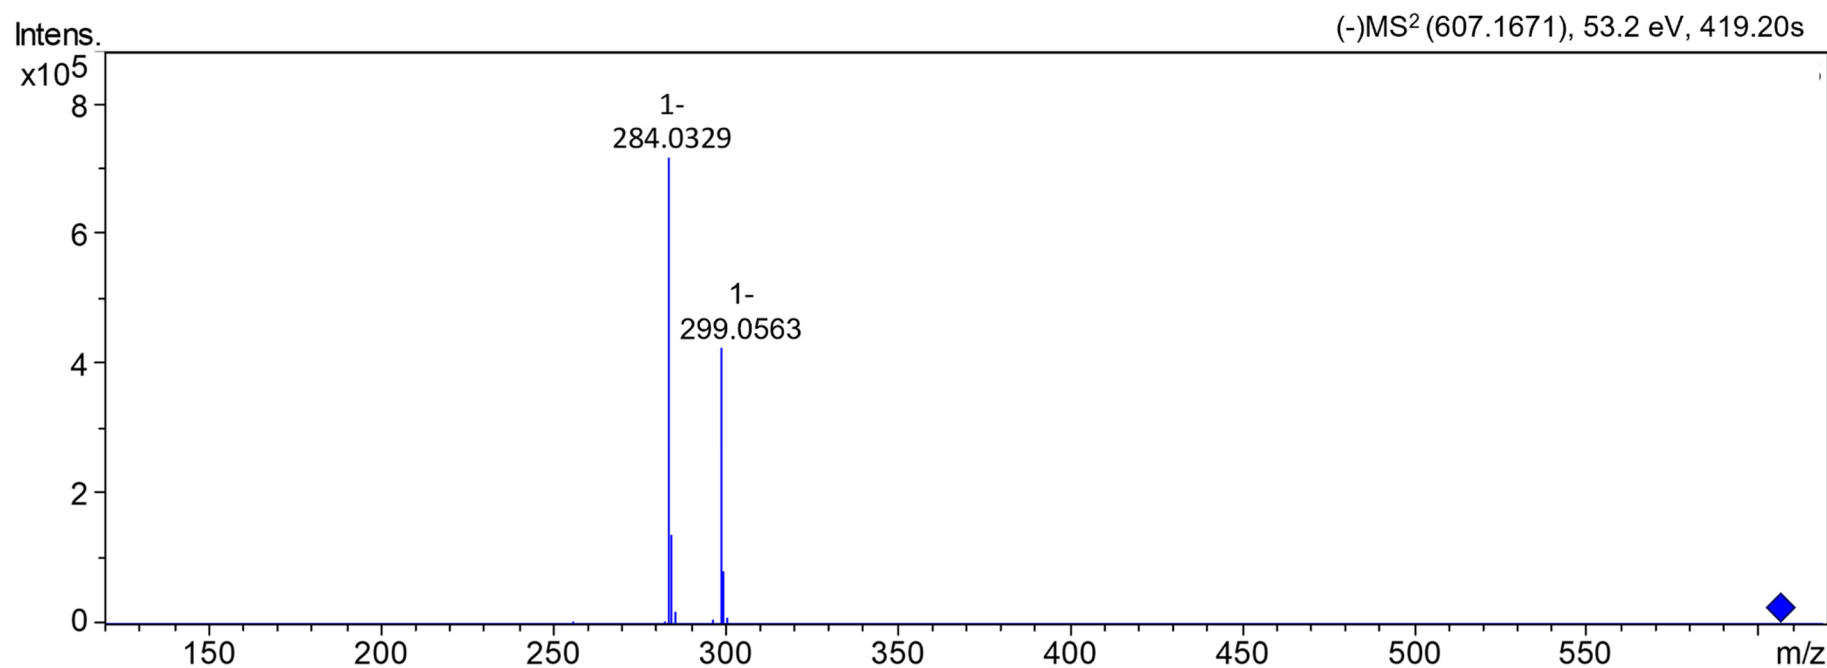

**Figure S14.** HRMS/MS spectrum of *Sonneratia apetala* major BPC compound **Sa M4** (biomarker **M607T418**) putatively annotated as **diosmin**.\*. Confirmed with commercial standards (in-house MS/MS spectra database)

### Detailed annotation

Compound M607T418 (also compound Sa M4) gave a deprotonated molecular ion  $[M-H]^-$  at  $m/z$  607.1671 corresponding to the raw formula  $C_{28}H_{32}O_{15}$ . Interrogation of in-house database led to a match of MS/MS spectrum with diosmin (Figure S2d), a disaccharide derivative consisting of diosmetin substituted by a rutinose at position 7 via a glycosidic linkage. This biomarker broke down into two major product ions at  $m/z$  299.0563 and 284.0329, confirming the characteristic loss of rutinose followed by a loss of a methyl. Finally, this assumption was further reinforced by the presence of diosmetin reported in two species from *Sonneratia* genus: *S. paracaseolaris* aerial parts [44] and *S. alba* leaves [45].

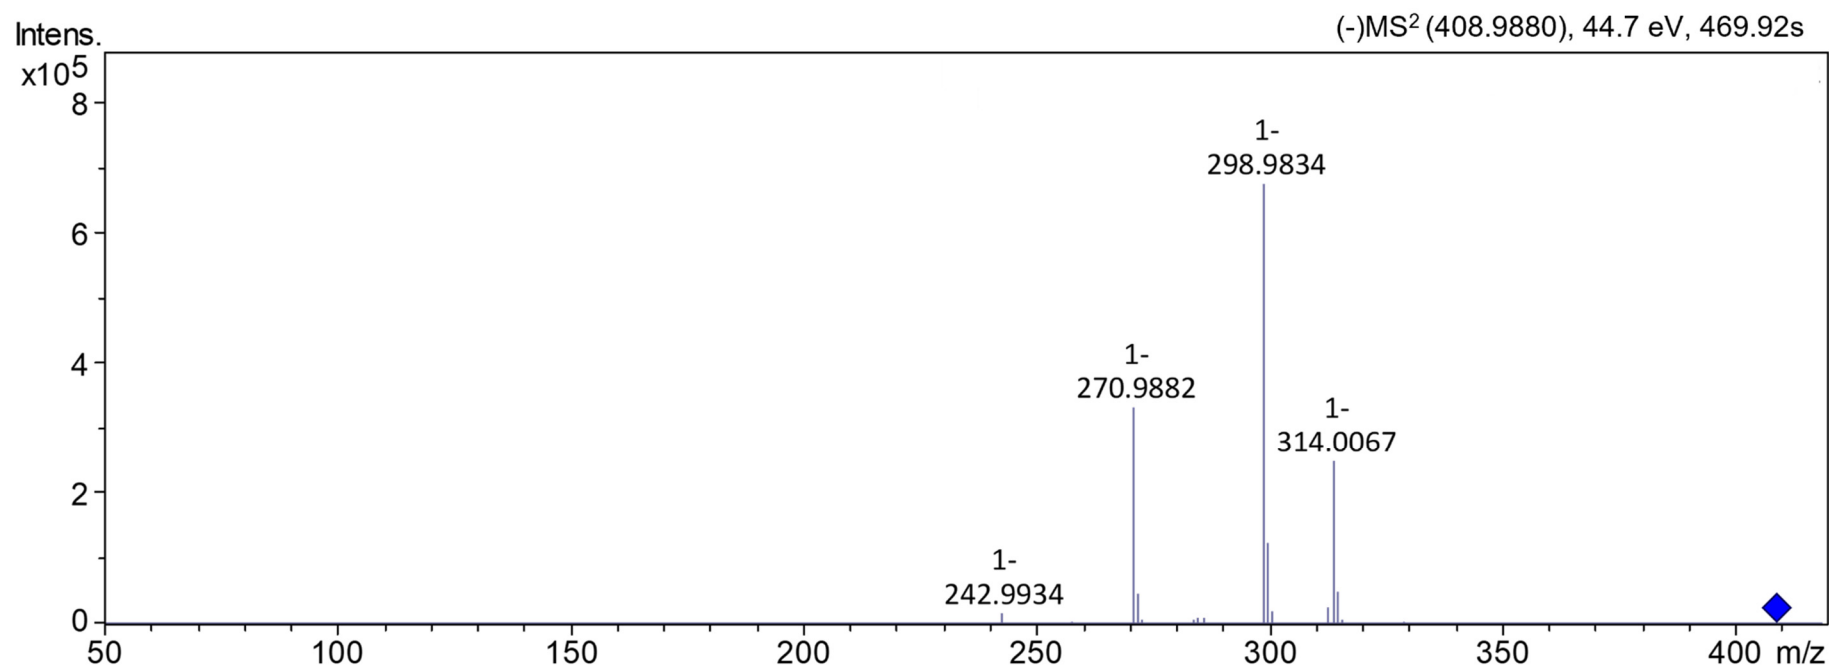

Figure S15. HRMS/MS spectrum of *Sonneratia apetala* major BPC compound Sa M5 putatively annotated as **dimethyl ellagic acid sulfate**.

### Detailed annotation

According to Manurung et al. 2021 [40], compound Sa M5 could be assigned to a dimethyl-ellagic acid sulfate (Figure S2e) since it followed the same fragmentation pattern as Sa M6 (Figure S16) (loss of a sulfate and methyl moieties) with a produced deprotonated molecular ion  $[M-H]^-$  at  $m/z$  408.9880 ( $C_{16}H_{10}O_{11}S$ ).



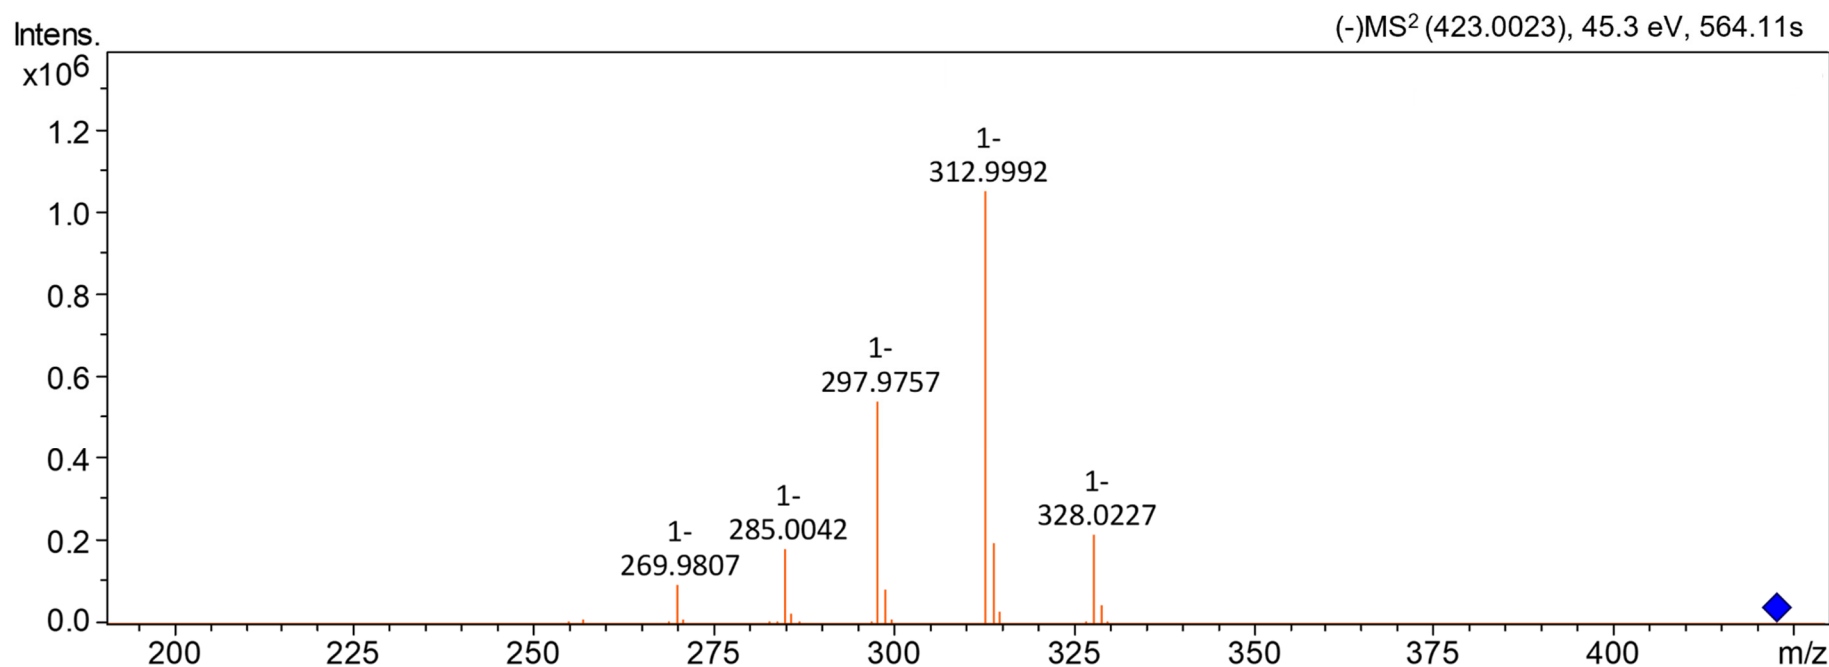

**Figure S16.** HRMS/MS spectrum of *Sonneratia apetala* major BPC compound **Sa M6** (biomarker **M481T560**) putatively annotated as **3,3',4'-trimethylellagic acid 4-sulfate**.

### Detailed annotation

Biomarker M481T560 (also BPC major compound **Sa M6**) of *S. apetala* leaves presented a deprotonated molecular ion [M-H]<sup>-</sup> at  $m/z$  423.0023 with an isotopic pattern indicating the possible presence of a sulfur atom. The presence of a [M-H-SO<sub>3</sub>]<sup>-</sup> fragment ion at  $m/z$  343.0471 confirmed this assumption and suggested a sulfated metabolite with a raw formula of C<sub>17</sub>H<sub>12</sub>SO<sub>11</sub>. Fragmentation pattern showed the successive loss of 3 methyl groups ( $m/z$  328.0227, 312.9992, 297.9757). After comparison with literature, this compound was putatively annotated as 3,3',4'-tri-O-methyl-ellagic acid 4-sulfate (Figure S2f) which have recently been reported for the first time in mangrove species in the roots of *Lumnitzera littorea* and *L. racemosa* from Indonesia [40].

## References

40. Manurung, J.; Kappen, J.; Schnitzler, J.; Frolov, A.; Wessjohann, L.A.; Agusta, A.; Muellner-Riehl, A.N.; Franke, K. Analysis of Unusual Sulfated Constituents and Anti-Infective Properties of Two Indonesian Mangroves, *Lumnitzera littorea* and *Lumnitzera racemosa* (Combretaceae). *Separations* **2021**, *8*, 82, doi:10.3390/separations8060082.
41. Vinh, L.B.; Nguyet, N.T.M.; Yang, S.Y.; Kim, J.H.; Thanh, N.V.; Cuong, N.X.; Nam, N.H.; Minh, C.V.; Hwang, I.; Kim, Y.H. Cytotoxic Triterpene Saponins from the Mangrove *Aegiceras corniculatum*. *Nat. Prod. Res.* **2019**, *33*, 628–634, doi:10.1080/14786419.2017.1402320.
42. Cruz, S.; Marroquín, M.N.; Cáceres, A. Biological Activity and Chemical Composition of Organic Extracts from Three Guatemalan Mangrove Trees. *Int. J. Phytocosmetics Nat. Ingrid.* **2019**, *6*, 10–10, doi:10.15171/ijpni.2019.10.
43. Costa, F. das N.; Jerz, G.; Hewitson, P.; Figueiredo, F. de S.; Ignatova, S. *Laguncularia racemosa* Phenolics Profiling by Three-Phase Solvent System Step-Gradient Using High-Performance Countercurrent Chromatography with Off-Line Electrospray Mass-Spectrometry Detection. *Molecules* **2021**, *26*, 2284, doi:10.3390/molecules26082284.
44. Miao, S.; Man, Y.-Q.; Zhou, X.-L.; Yang, L.-J.; Gong, K.-K. Chemical Constituents from Mangrove Plant *Sonneratia paracaseolaris*. *Chin. Tradit. Herb. Drugs* **2018**, *49*, 1025–1030, doi:10.7501/j.issn.0253-2670.2018.05.006.
45. Sasmito, B.; Sulistiyati, T.D.; Hardoko, H. Phytochemicals and Identification of Antioxidant Compounds from Ethanol Extract of *Sonneratia alba* Leaves and Bark. *Russ. J. Agric. Socio-Econ. Sci.* **2019**, *95*, 190–196, doi:10.18551/rjoas.2019-11.26.
46. Li, Z.-H.; Guo, H.; Xu, W.-B.; Ge, J.; Li, X.; Alimu, M.; He, D.-J. Rapid Identification of Flavonoid Constituents Directly from PTP1B Inhibitive Extract of Raspberry (*Rubus idaeus* L.) Leaves by HPLC–ESI–QTOF–MS–MS. *J. Chromatogr. Sci.* **2016**, *54*, 805–810, doi:10.1093/chromsci/bmw016.
47. Yi, X.; Jiang, S.; Qin, M.; Liu, K.; Cao, P.; Chen, S.; Deng, J.; Gao, C. Compounds from the Fruits of Mangrove *Sonneratia apetala*: Isolation, Molecular Docking and Antiaging Effects Using a *Caenorhabditis elegans* Model. *Bioorganic Chem.* **2020**, *99*, 103813, doi:10.1016/j.bioorg.2020.103813.
48. Wu, S.-B.; Wen, Y.; Li, X.-W.; Zhao, Y.; Zhao, Z.; Hu, J.-F. Chemical Constituents from the Fruits of *Sonneratia caseolaris* and *Sonneratia ovata* (Sonneratiaceae). *Biochem. Syst. Ecol.* **2009**, *37*, 1–5, doi:10.1016/j.bse.2009.01.002.
49. Sadhu, S.K.; Ahmed, F.; Ohtsuki, T.; Ishibashi, M. Flavonoids from *Sonneratia caseolaris*. *J. Nat. Med.* **2006**, *60*, 264–265, doi:10.1007/s11418-006-0029-3.
50. Wu, Y.-L.; Chen, J.-F.; Jiang, L.-Y.; Wu, X.-L.; Liu, Y.-H.; Gao, C.-J.; Wu, Y.; Yi, X.-Q.; Su, Z.-R.; Cai, J.; et al. The Extract of *Sonneratia apetala* Leaves and Branches Ameliorates Hyperuricemia in Mice by Regulating Renal Uric Acid Transporters and Suppressing the Activation of the JAK/STAT Signaling Pathway. *Front. Pharmacol.* **2021**, *12*, 1826, doi:10.3389/fphar.2021.698219.
51. Li, Y.; Yu, S.; Liu, D.; Proksch, P.; Lin, W. Inhibitory Effects of Polyphenols toward HCV from the Mangrove Plant *Excoecaria agallocha* L. *Bioorg. Med. Chem. Lett.* **2012**, *22*, 1099–1102, doi:10.1016/j.bmcl.2011.11.109.
52. De Rosso, M.; Panighel, A.; Vedova, A.; Gardiman, M.; Flamini, R. Characterization of Non-Anthocyanic Flavonoids in Some Hybrid Red Grape Extracts Potentially Interesting for Industrial Uses. *Molecules* **2015**, *20*, 18095–18106, doi:10.3390/molecules201018095.
53. Saldanha, L.L.; Vilegas, W.; Dokkedal, A.L. Characterization of Flavonoids and Phenolic Acids in *Myrcia bella* Cambess. Using FIA-ESI-IT-MS(n) and HPLC-PAD-ESI-IT-MS Combined with NMR. *Mol. Basel Switz.* **2013**, *18*, 8402–8416, doi:10.3390/molecules18078402.
54. Singh, A.; Bajpai, V.; Kumar, S.; Sharma, K.R.; Kumara, B. Profiling of Gallic and Ellagic Acid Derivatives in Different Plant Parts of *Terminalia arjuna* by HPLC-ESI-QTOF-MS/MS. *Nat. Prod. Commun.* **2016**, *11*, 239–244.
